# Supplementary material for: SPAT-1/Bora acts with Polo-like kinase 1 to regulate PAR polarity and cell cycle progression
Source: Oxford University Press journal article supplement (doi:10.1242/dev.055293), 2010-09-07
Supplement: dev055293supptables1.pdf [file dev055293supptables1.pdf]

**Table S1. Mean cell cycle timing (in seconds  $\pm$  s.e.m.) of the interphase of AB ( $I_{AB}$ ) and P1 cell ( $I_{P1}$ ) scored as an interval between NEBD of AB cell and P0 and NEBD of P1 cell and P0, respectively**

| Genotype             | $\Delta t$ (seconds) |                 |                       | $n$ | $P$ -values     |                 |                       |
|----------------------|----------------------|-----------------|-----------------------|-----|-----------------|-----------------|-----------------------|
|                      | $I_{P0}-I_{AB}$      | $I_{P0}-I_{P1}$ | Ratio $I_{P1}/I_{AB}$ |     | $I_{P0}-I_{AB}$ | $I_{P0}-I_{P1}$ | Ratio $I_{P1}/I_{AB}$ |
| Wild type            | 751 $\pm$ 15         | 891 $\pm$ 15    | 1.19 $\pm$ 0.01       | 7   | –               | –               | –                     |
| <i>control(RNAi)</i> | 827 $\pm$ 31         | 987 $\pm$ 40    | 1.19 $\pm$ 0.01       | 7   | 0.025           | 0.026           | 0.75                  |
| <i>spat-1(RNAi)</i>  | 901 $\pm$ 30         | 1108 $\pm$ 35   | 1.23 $\pm$ 0.01       | 15  | <0.001          | <0.001          | 0.002                 |
| <i>plk-1(RNAi)</i>   | 897 $\pm$ 65         | 1103 $\pm$ 78   | 1.22 $\pm$ 0.01       | 7   | 0.09            | 0.058           | 0.027                 |

Data are plotted in Fig. 2A. Genotypes of analysed worms are indicated.  $n$  corresponds to the number of embryos analysed.  $P$ -values were calculated by two-tailed  $t$ -test comparing mutants with wild type.
