# Supplementary material for: SPAT-1/Bora acts with Polo-like kinase 1 to regulate PAR polarity and cell cycle progression
Source: Oxford University Press journal article supplement (doi:10.1242/dev.055293), 2010-09-07
Supplement: dev055293supptables2.pdf [file dev055293supptables2.pdf]

**Table S2. Mean time (in seconds  $\pm$  s.e.m.) separating meiosis II exit from NEBD of the male and female pronuclei and the interval between female and male NEBD in embryos of the indicated genotypes**

| Genotype                         | Meiosis II exit –<br>male NEBD | Meiosis II exit –<br>female NEBD | $\Delta t$ (seconds) | <i>n</i> | <i>P</i> -value |
|----------------------------------|--------------------------------|----------------------------------|----------------------|----------|-----------------|
| <i>zyg-9(b244ts)</i>             | 555 $\pm$ 12                   | 630 $\pm$ 14                     | 73 $\pm$ 8           | 9        | –               |
| <i>air-1(RNAi);zyg-9(b244ts)</i> | 788 $\pm$ 42                   | 791 $\pm$ 42                     | 2.5 $\pm$ 3          | 8        | <0.001          |
| <i>spat-1(RNAi)zyg9(b244ts)</i>  | 675 $\pm$ 50                   | 925 $\pm$ 77                     | 250 $\pm$ 37         | 6        | <0.001          |
| <i>plk-1(RNAi);zyg-9(b244ts)</i> | 866 $\pm$ 55                   | 1173 $\pm$ 91                    | 301 $\pm$ 42         | 6        | 0.003           |

Data are represented in Fig. 2B. The number of embryos analysed (*n*) and *P*-values [calculated for  $\Delta t$  by two-tailed *t*-test comparing double mutants with the single *zyg-9(b244ts)*] are indicated.
