# Supplementary material for: SPAT-1/Bora acts with Polo-like kinase 1 to regulate PAR polarity and cell cycle progression
Source: Oxford University Press journal article supplement (doi:10.1242/dev.055293), 2010-09-07
Supplement: dev055293supptables3.pdf [file dev055293supptables3.pdf]

**Table S3. Normalised cytoplasmic SPAT-1 levels in embryos of the indicated genotypes**

| Genotype                        | Normalised cytoplasmic SPAT-1 levels |           | P-values           |           |                     |           |
|---------------------------------|--------------------------------------|-----------|--------------------|-----------|---------------------|-----------|
|                                 | Anterior                             | Posterior | Wild-type anterior |           | Wild-type posterior |           |
|                                 |                                      |           | Anterior           | Posterior | Anterior            | Posterior |
| Wild type                       | 0.79±0.03                            | 1.00±0.02 | –                  | <0.01     | <0.01               | –         |
| <i>par-3(it71)</i>              | 1.07±0.03                            | 1.12±0.04 | <0.01              | <0.01     | 0.2                 | 0.058     |
| <i>par-1(zu310)</i>             | 0.79±0.03                            | 0.80±0.03 | 0.86               | 0.52      | <0.01               | <0.01     |
| <i>plk-1(RNAi)</i>              | 1.62±0.05                            | 1.66±0.05 | <0.01              | <0.01     | <0.01               | <0.01     |
| <i>plk-1(RNAi);par-1(zu310)</i> | 1.46±0.05                            | 1.46±0.05 | <0.01              | <0.01     | <0.01               | <0.01     |

Values represent mean fluorescence intensities of cytoplasmic SPAT-1 ± s.e.m. for data plotted in Fig. 6K. Values were normalised according to SPAT-1 levels in the wild-type posterior cell. Two-tailed *t*-test was used to compare the mutant with the control anterior and posterior values.
